# Supplementary material
Source: MDPI journal article supplement (https://www.mdpi.com/2413-8851/5/2/45)
Supplement: s1 [file s1]

Archive with 1 entries (1 files):
- urbansci-1141282-supplementary.pdf
