# Supplementary material
Source: MDPI journal article supplement (https://www.mdpi.com/2413-8851/5/2/45)
Supplement: s1 [file s1 › urbansci-1141282-supplementary.pdf]

# Supplementary Material

**Table S1. Distribution of the sample according to territorial aggregations.**

| indicators             |                                   | Level of completed studies (aged 25 or over) |        |                  |        | Self-perceived health of people aged 16 and over |        |                   |        | Rate of risk of poverty 60% median - Total CAT |        |                 |        | Social structure ESEC (9+1) People aged 16 and over |        |                                 |        |
|------------------------|-----------------------------------|----------------------------------------------|--------|------------------|--------|--------------------------------------------------|--------|-------------------|--------|------------------------------------------------|--------|-----------------|--------|-----------------------------------------------------|--------|---------------------------------|--------|
|                        |                                   | Without higher education                     |        | Higher education |        | Rest                                             |        | Good or very good |        | Not at risk                                    |        | Risk of poverty |        | Qualified (ESEC=1,2,3)                              |        | Rest of the population (ESEC>3) |        |
|                        |                                   | population                                   | Sample | population       | Sample | population                                       | Sample | population        | Sample | population                                     | Sample | population      | Sample | population                                          | Sample | population                      | Sample |
| Spatial planning areas | Metropolità                       | 2,432,879                                    | 2506   | 1,055,038        | 1069   | 831,467                                          | 910    | 2,732,555         | 2729   | 3,703,620                                      | 4197   | 932,457         | 1170   | 1,117,805                                           | 1207   | 2,506,924                       | 2492   |
|                        | Comarques Gironines               | 416,058                                      | 594    | 127,503          | 168    | 141,481                                          | 215    | 424,010           | 572    | 551,935                                        | 828    | 189,964         | 251    | 131,268                                             | 188    | 439,616                         | 609    |
|                        | Camp de Tarragona                 | 276,824                                      | 457    | 102,356          | 155    | 101,198                                          | 186    | 298,920           | 442    | 380,718                                        | 648    | 137,937         | 211    | 95,155                                              | 156    | 309,106                         | 483    |
|                        | Terres de l'Ebre                  | 126,382                                      | 260    | 18,551           | 47     | 42,549                                           | 99     | 100,966           | 203    | 124,924                                        | 275    | 66,707          | 138    | 22,623                                              | 57     | 134,740                         | 266    |
|                        | Ponent i Alt Pirineu i Aran       | 248,049                                      | 525    | 83,672           | 164    | 110,394                                          | 205    | 227,424           | 469    | 345,627                                        | 788    | 97,584          | 195    | 79,088                                              | 171    | 275,828                         | 554    |
|                        | Comarques Centrals                | 241,163                                      | 550    | 62,914           | 150    | 80,563                                           | 204    | 237,595           | 504    | 332,053                                        | 757    | 73,435          | 208    | 54,768                                              | 135    | 262,803                         | 580    |
|                        | Penedès                           | 311,230                                      | 495    | 118,836          | 155    | 108,024                                          | 174    | 360,702           | 503    | 449,618                                        | 719    | 153,038         | 219    | 129,627                                             | 182    | 330,552                         | 494    |
| Population size        | Up to 5000 inhabitants            | 468,077                                      | 915    | 124,508          | 234    | 167,434                                          | 342    | 440,774           | 792    | 611,333                                        | 1223   | 178,986         | 369    | 124,590                                             | 241    | 499,740                         | 942    |
|                        | From 5001 to 10,000 inhabitants   | 348,549                                      | 788    | 124,828          | 258    | 117,268                                          | 285    | 369,762           | 778    | 523,587                                        | 1189   | 122,364         | 311    | 128,231                                             | 278    | 369,981                         | 811    |
|                        | From 10,001 to 50,000 inhabitants | 1,150,566                                    | 1449   | 384,362          | 450    | 390,815                                          | 514    | 1,220,249         | 1441   | 1,571,442                                      | 2088   | 526,478         | 685    | 423,485                                             | 521    | 1,203,193                       | 1468   |
|                        | From 50,001 to 100,000 inhabits   | 542,106                                      | 640    | 208,060          | 245    | 189,774                                          | 233    | 618,191           | 691    | 854,507                                        | 1065   | 201,788         | 232    | 224,126                                             | 270    | 562,947                         | 646    |
|                        | More than 100,000 inhabits        | 775,471                                      | 876    | 225,829          | 266    | 246,341                                          | 304    | 759,287           | 845    | 1,007,455                                      | 1300   | 326,232         | 415    | 236,475                                             | 304    | 819,807                         | 891    |
|                        | Barcelona                         | 767,817                                      | 719    | 501,282          | 455    | 304,043                                          | 315    | 973,912           | 875    | 1,320,173                                      | 1347   | 295,275         | 380    | 493,428                                             | 482    | 803,898                         | 720    |
| Degree of urbanization | Densely populated area            | 3,244,948                                    | 3654   | 1,327,754        | 1428   | 1,118,724                                        | 1345   | 3,607,557         | 3852   | 4,793,405                                      | 5798   | 1,294,266       | 1638   | 1,386,574                                           | 1586   | 3,386,192                       | 3682   |
|                        | Semi-urban or intermediate area   | 424,675                                      | 867    | 143,007          | 258    | 139,775                                          | 309    | 443,630           | 832    | 599,375                                        | 1218   | 219,061         | 449    | 143,127                                             | 272    | 457,225                         | 896    |
|                        | Sparsely populated area           | 382,963                                      | 866    | 98,109           | 222    | 157,177                                          | 339    | 330,986           | 738    | 495,717                                        | 1196   | 137,794         | 305    | 100,634                                             | 238    | 416,150                         | 900    |
| Segregation            | Vulnerable setting                | 421,400                                      | 532    | 75,864           | 93     | 140,429                                          | 200    | 380,768           | 442    | 462,374                                        | 657    | 214,438         | 301    | 70,403                                              | 102    | 459,565                         | 559    |
|                        | Non-vulnerable setting            | 3,438,141                                    | 4544   | 1,288,007        | 1537   | 1,188,404                                        | 1650   | 3,671,073         | 4519   | 4,963,586                                      | 6849   | 1,352,129       | 1957   | 1,352,602                                           | 1720   | 3,595,675                       | 4592   |
|                        | Well-off setting                  | 193,045                                      | 311    | 204,999          | 278    | 86,842                                           | 143    | 330,332           | 461    | 462,536                                        | 706    | 84,554          | 134    | 207,330                                             | 274    | 204,327                         | 327    |
| Catalonia              |                                   | 4,052,586                                    | 5387   | 1,568,870        | 1908   | 1,415,675                                        | 1993   | 4,382,174         | 5422   | 5,888,496                                      | 8212   | 1,651,122       | 2392   | 1,630,335                                           | 2096   | 4,259,567                       | 5478   |

Note: The effective sample size of ECVHP2011 is 4235 households (sample units) distributed in 529 census tracts and from which a sample of 10,604 individuals and 8000 aged 16 and over has been obtained. Sampling errors for Catalonia as a whole are  $\pm 1\%$  for individuals and  $\pm 1.5\%$  for households. Source: In-house construction based on the ECVHP, 2011.

**Table S2. Spearman's correlation according to territorial aggregations.**

|                               | Higher education and Self-perceived health (good or very good) | Higher education and overall life satisfaction | Higher education and not at risk of poverty | Higher education and qualified (ESEC = 1,2,3) | Self-perceived health (good or very good) and overall life satisfaction | Self-perceived health (good or very good) and not at risk of poverty | Self-perceived health (good or very good) and qualified (ESEC = 1,2,3) | Overall life satisfaction and not at risk of poverty | Overall life satisfaction and qualified (ESEC = 1,2,3) | Qualified (ESEC = 1,2,3) and not at risk of poverty |
|-------------------------------|----------------------------------------------------------------|------------------------------------------------|---------------------------------------------|-----------------------------------------------|-------------------------------------------------------------------------|----------------------------------------------------------------------|------------------------------------------------------------------------|------------------------------------------------------|--------------------------------------------------------|-----------------------------------------------------|
| <b>Territorial setting</b>    | 0.679                                                          | -0.179                                         | 0.286                                       | 0.964                                         | 0.464                                                                   | 0.107                                                                | 0.821                                                                  | 0.393                                                | 0.000                                                  | 0.214                                               |
| <b>Population size</b>        | 0.943                                                          | 0.257                                          | 0.714                                       | 0.943                                         | 0.029                                                                   | 0.600                                                                | 0.886                                                                  | 0.429                                                | 0.143                                                  | 0.486                                               |
| <b>Degree of urbanization</b> | 1.000                                                          | -1.000                                         | 0.500                                       | 1.000                                         | -1.000                                                                  | 0.500                                                                | 1.000                                                                  | -0.500                                               | -1.000                                                 | 0.500                                               |
| <b>Segregation</b>            | 1.000                                                          | 1.000                                          | 1.000                                       | 1.000                                         | 1.000                                                                   | 1.000                                                                | 1.000                                                                  | 1.000                                                | 1.000                                                  | 1.000                                               |

Source: In-house construction based on the ECVHP, 2011.

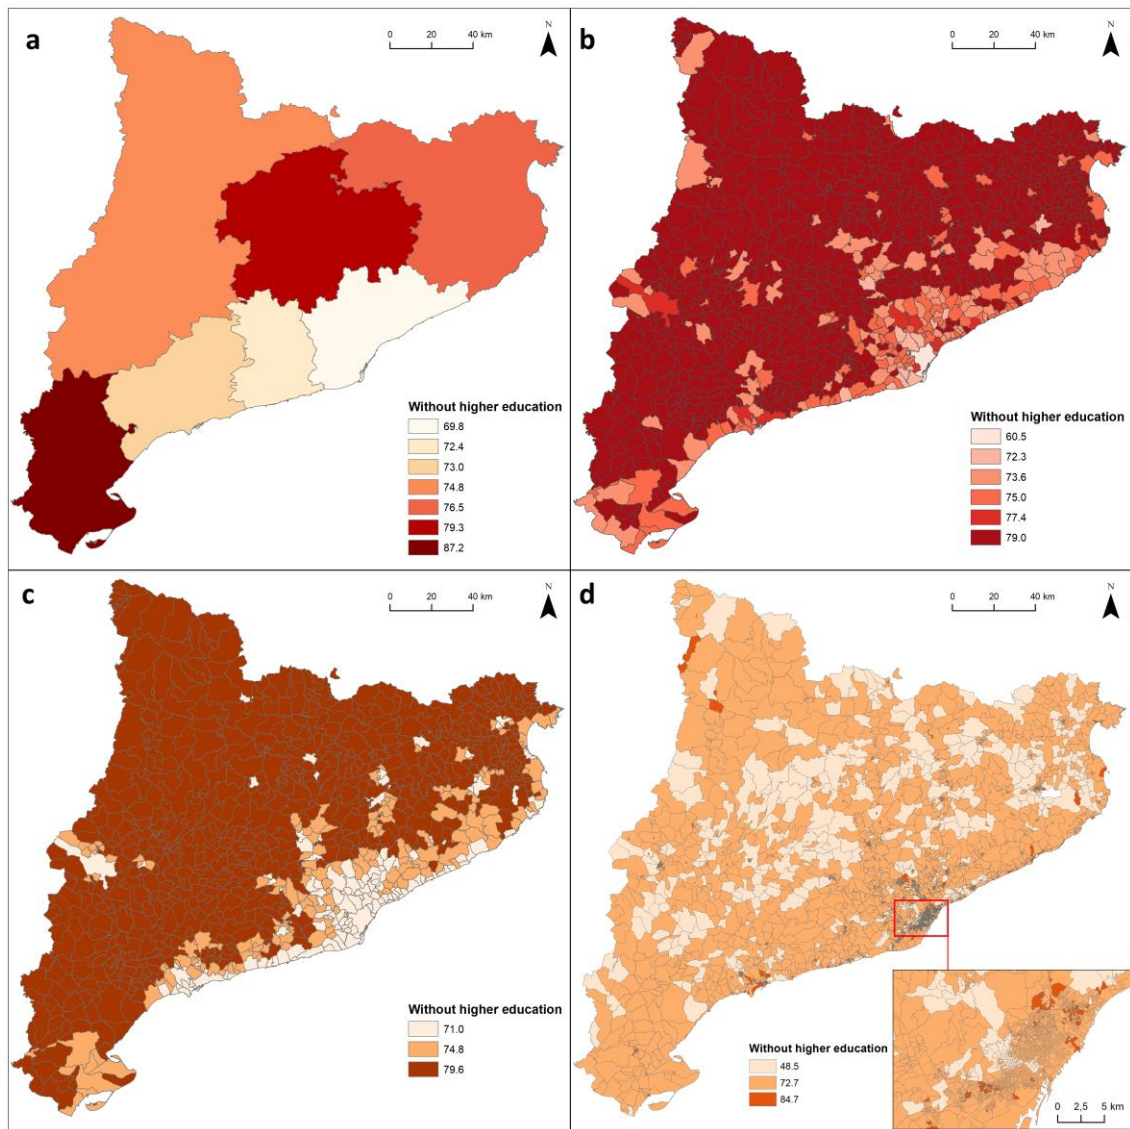

**Figure S1.** Percentage of population (aged 25 or over) without higher education according to Territorial settings, Catalonia. (a)Planning settings; (b)Population size; (c) Urban/rural character; (d) Residential segregation. Source: In-house construction based on the ECVHP, 2011.

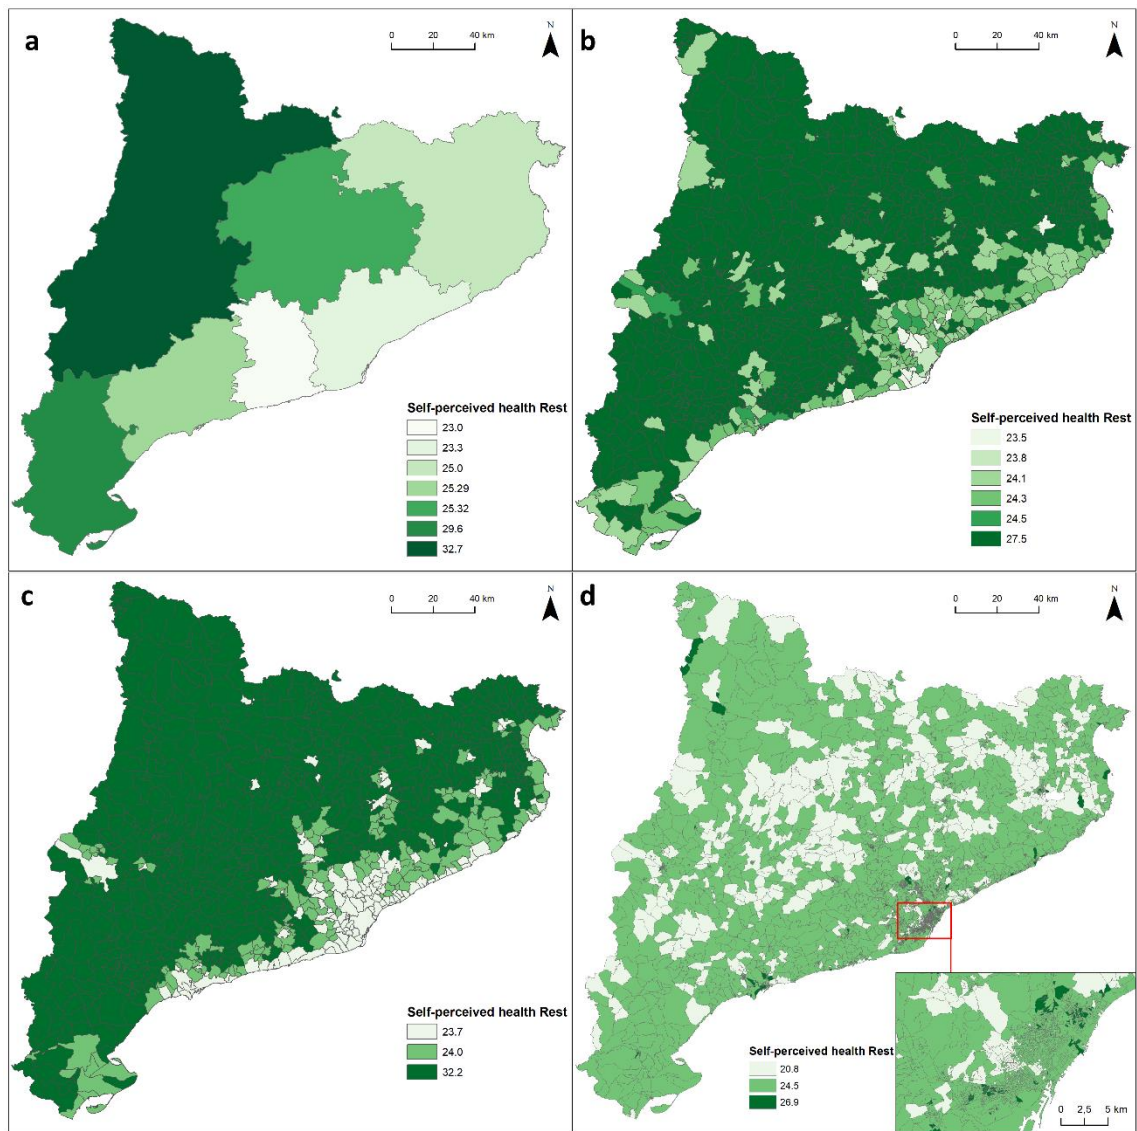

**Figure S2.** Percentage of population (aged 16 and over) with self-perceived health no good according to Territorial settings, Catalonia. (a)Planning settings; (b)Population size; (c) Urban/rural character; (d) Residential segregation. Source: In-house construction based on the ECVHP, 2011.

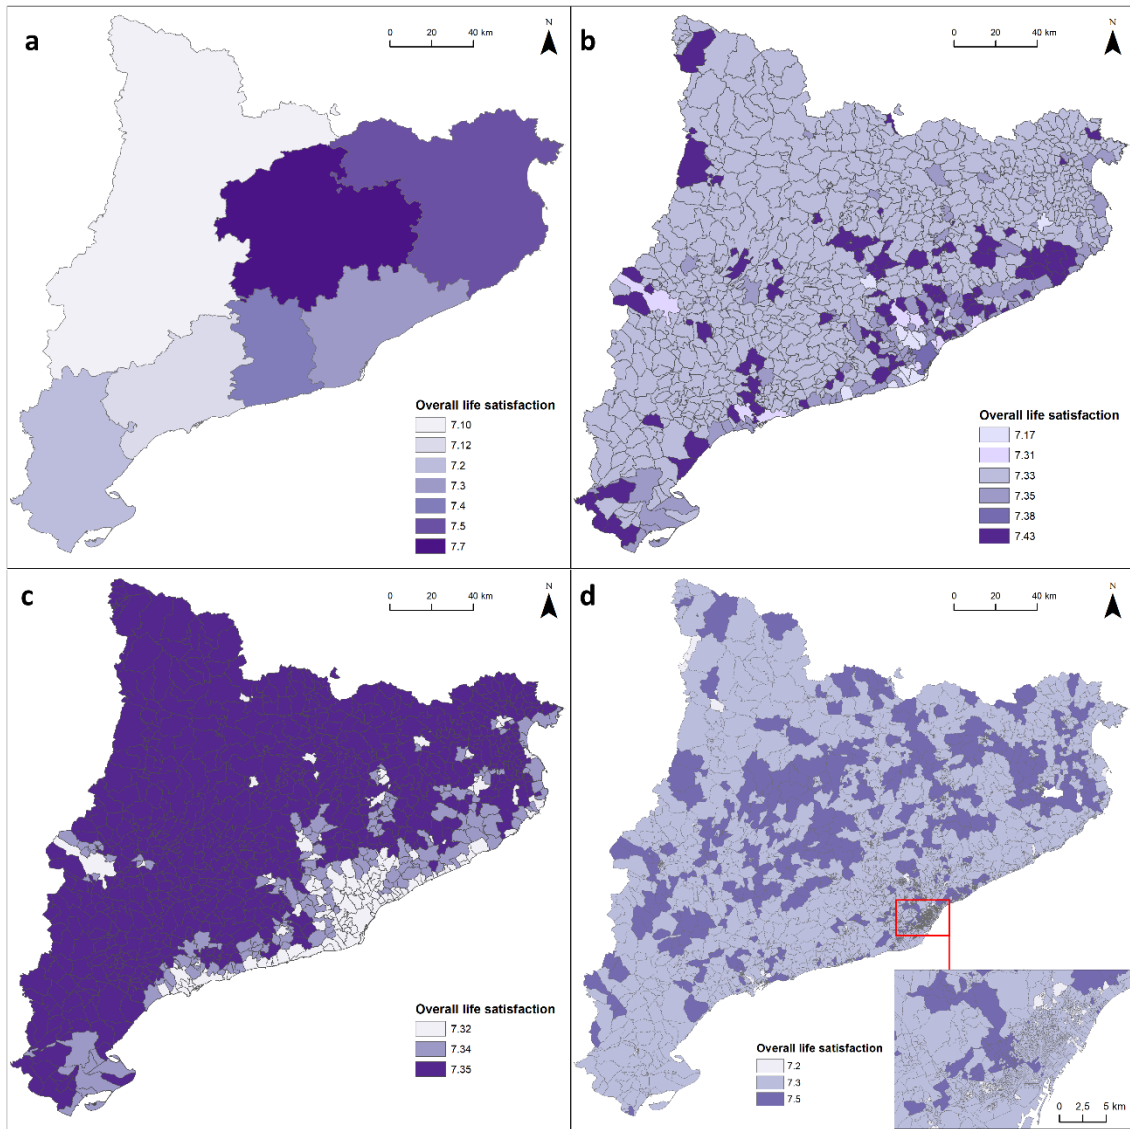

**Figure S3.** Overall life satisfaction of people (aged 16 and over) according to Territorial settings, Catalonia. (a) Planning settings; (b) Population size; (c) Urban/rural character; (d) Residential segregation. Source: In-house construction based on the ECVHP, 2011.

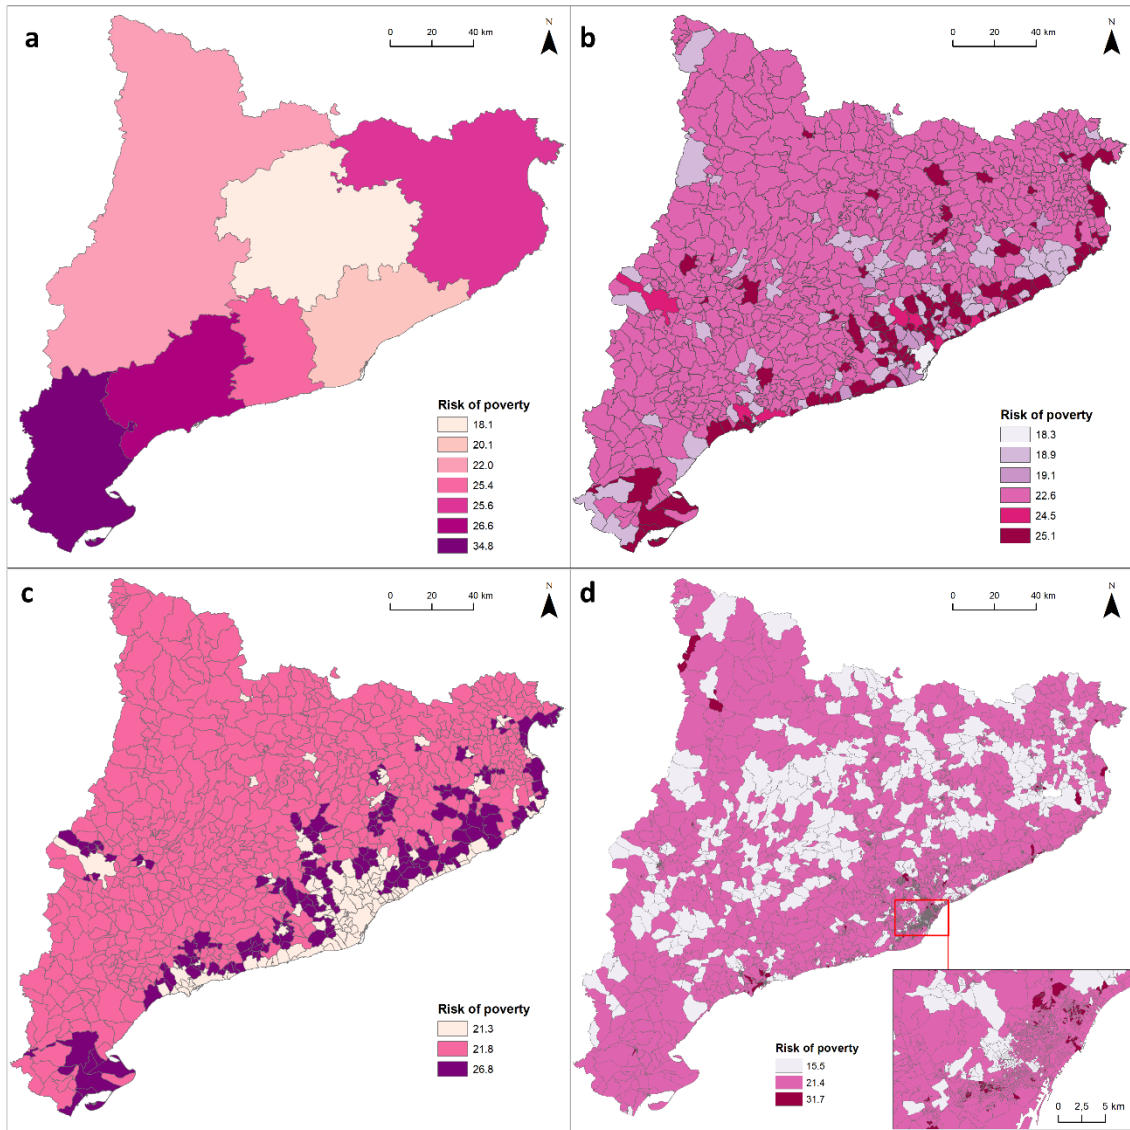

**Figure S4.** Percentage of population risk of poverty (60% median) according to Territorial settings, Catalonia. (a)Planning settings; (b)Population size; (c) Urban/rural character; (d) Residential segregation. Source: In-house construction based on the ECVHP, 2011.

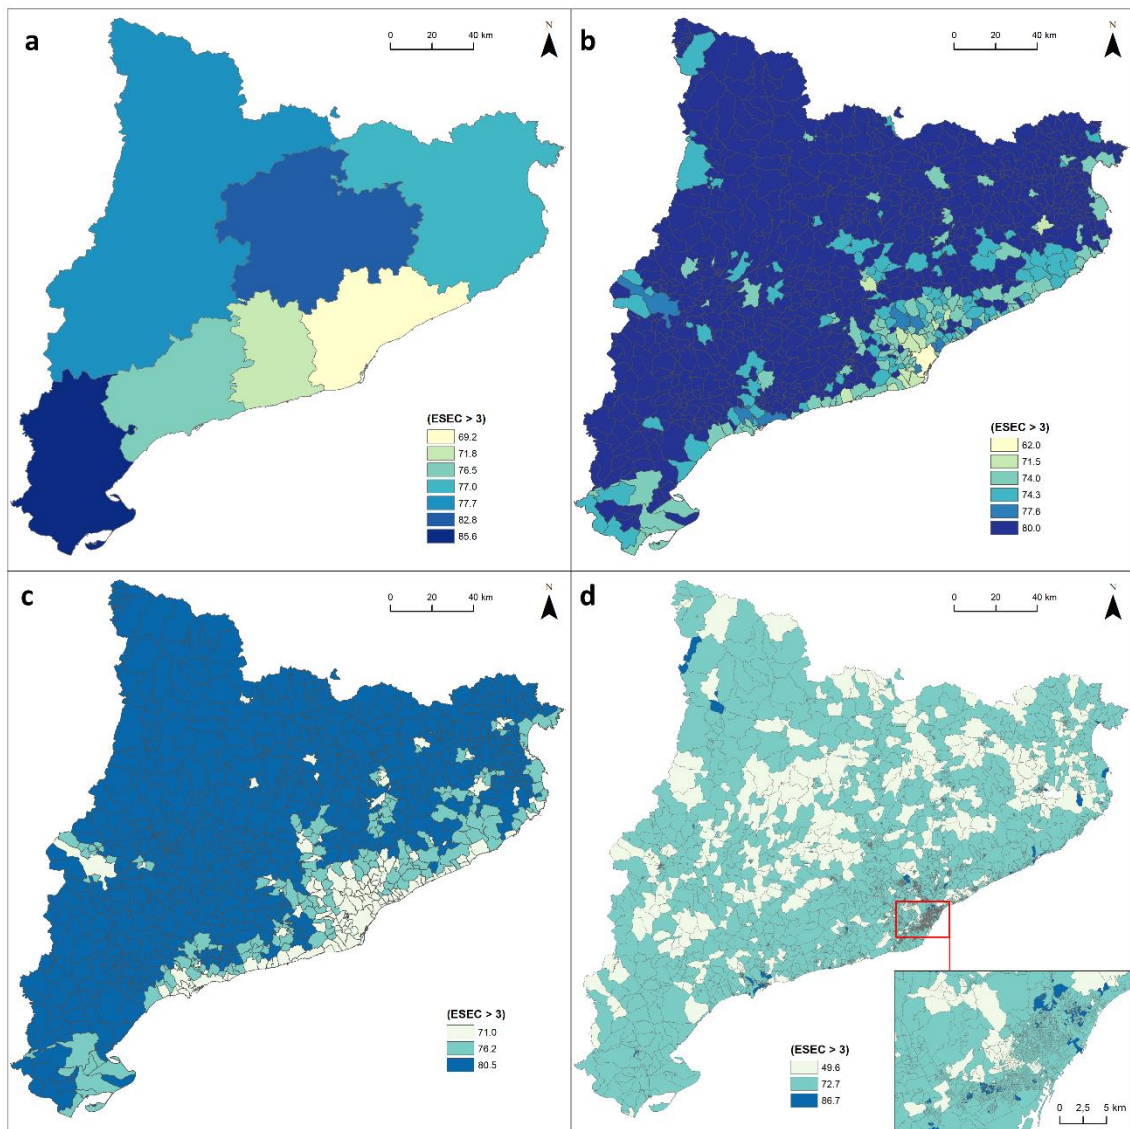

**Figure S5.** Percentage of population (aged 16 and over) social structure no qualified (ESEC > 3) according to Territorial settings, Catalonia. (a)Planning settings; (b)Population size; (c) Urban/rural character; (d) Residential segregation. Source: In-house construction based on the ECVHP, 2011.
